## **Title: Calpains are required for efficient microtubule detyrosination**

Running Title: Calpain-dependent MT detyrosination

Julia Bär<sup>1,2,\*</sup>, Yannes Popp<sup>1,2</sup>, Tomas Koudelka<sup>3</sup>, Andreas Tholey<sup>3</sup>, Marina Mikhaylova<sup>1,2,\*</sup>

<sup>1</sup> AG Optobiology, Institute of Biology, Humboldt Universität zu Berlin, Berlin, Germany

<sup>2</sup> Guest Group “Neuronal Protein Transport”, Center for Molecular Neurobiology, ZMNH, University Medical Center Hamburg-Eppendorf, Hamburg, Germany

<sup>3</sup> Systematic Proteome Research & Bioanalytics, Institute of Experimental Medicine, Christian-Albrechts-University, Kiel, Germany

\* Correspondence: [julia.baer.2@hu-berlin.de](mailto:julia.baer.2@hu-berlin.de) and [marina.mikhaylova@hu-berlin.de](mailto:marina.mikhaylova@hu-berlin.de)

Keywords: Microtubules, detyrosination, vasohibin, calpain, mass spectrometry

2 Summary Statement

3 The conventional calpains 1 and 2 play an important role in the regulation of microtubule  
4 detyrosination in a vasohibin independent way. Thus, they possibly control another still  
5 unknown tubulin carboxypeptidase.

6 Abstract

7 Detyrosination is a major post-translational modification of microtubules (MT), which has significant  
8 impact on MT function in cell division, differentiation, growth, migration, polarity, and intracellular  
9 trafficking. Detyrosination of  $\alpha$ -tubulin occurs via the recently identified complex of vasohibin 1/2  
10 (vash1/2) and small vasohibin binding protein (SVBP). However, there is still remaining detyrosinating  
11 activity in the absence of vash1/2/SVBP, and little is known about the regulation of detyrosination.  
12 Using cellular and cell-free assays we showed that the calcium-dependent proteases calpains 1 and 2  
13 regulate MT detyrosination. We identified new calpain cleavage sites in the N-terminal disordered  
14 region of vash1 using *in vitro* proteolysis followed by mass spectrometry. However, this cleavage did  
15 not affect the detyrosination activity of vasohibin. In conclusion, the regulation of MT detyrosination  
16 by calpains occurs via another yet unknown tubulin carboxypeptidase. Importantly, calpains' calcium  
17 dependency could allow a fine regulation of MT detyrosination. Thus, identifying the calpain-  
18 regulated pathway of MT detyrosination can be of major importance for several basic and clinical  
19 research and should be focused on in future studies.

## 20 **Introduction**

21 In eukaryotic cells actin filaments, intermediate filaments, and microtubules (MT) are key  
22 components of the cytoskeleton. MTs play a crucial role in cell division, differentiation, growth,  
23 migration, polarity, and intracellular trafficking. Their structure, stability and functions are tightly  
24 regulated. MTs are hollow tubes with a well-defined polarity formed through head-to-tail  
25 polymerization of  $\alpha$ - and  $\beta$ -tubulin heterodimers. They are about 24 nm in diameter and mainly build  
26 from 13 protofilaments. Polymerization of guanosine-5'-triphosphate (GTP)-bound tubulin-dimers  
27 leads to growth of MTs. Over time,  $\beta$ -tubulin hydrolyses GTP to guanosine-5'-diphosphate (GDP),  
28 which makes MTs more prone to depolymerization. A cap of GTP-bound tubulin will form at the plus  
29 end and protect the MT from disassembly. When hydrolysis catches up with polymerization, the tip  
30 will become GDP-bound, and the MT will depolymerize in an event called catastrophe. Upon reaching  
31 a GTP island or assembly of new GTP-bound tubulin, the MT will undergo a so-called rescue and will  
32 grow again. This continuous switch is called dynamic instability, as the MT overall persists, but its  
33 subunit composition changes (Dimitrov et al., 2008; Théry and Blanchoin, 2021). The more dynamic  
34 and fast-growing part of the MT is called plus end, whereas the more stable is the minus end (Desai  
35 and Mitchison, 1997). This intrinsic asymmetry is recognized by kinesins and dynein motor proteins  
36 that move along MTs in a directed fashion and mediate active long-distance cargo transport.

37 The tubulin family has expanded during evolution with expression of several  $\alpha$ - and  $\beta$ -tubulin  
38 isoforms (8 and 9 in human, respectively). Both isotypes can undergo different post-translational  
39 modifications (PTMs), which may act as traffic signals and regulate stability and function of MTs, thus  
40 defining the so-called tubulin code (Garnham and Roll-Mecak, 2012; Janke, 2014). PTMs can label a  
41 subset of MTs as tracks for specific cargo-motor protein complexes, increase interaction with certain  
42 microtubule-associated proteins (MAPs), that can bundle MTs together, or change their stability by  
43 recruiting MT-severing proteins or polymerization promoting factors (Janke, 2014).

44 The removal of the C-terminal tyrosine of  $\alpha$ -tubulin, called detyrosination, is one of the first  
45 discovered PTMs of MTs (Janke, 2014). Tubulin detyrosination occurs in a great variety of species  
46 ranging from invertebrates to humans and affects almost all  $\alpha$ -tubulin isoforms (Janke, 2014;  
47 Redeker, 2010). In contrast to classical proteolytic cleavage, tubulin detyrosination is reversible.  
48 Upon depolymerization of MTs, the tyrosine residue can be re-ligated by tubulin tyrosine ligase (TTL),  
49 thereby returning  $\alpha\beta$ -tubulin dimers to the polymerization-depolymerization cycle. In fact, the  
50 presence or absence of the tyrosine residue has dramatic consequences for tumor progression,  
51 cardiomyocyte function and neuronal organization (Chen et al., 2018; Dubey et al., 2015; Heinz et al.,  
52 2017). Detyrosination is a very common modification in the mammalian brain and distortion of the

53 tubulin turnover is observed in several pathological conditions. Thus, reduced MT stability has been  
54 reported in several neurodegenerative diseases including Alzheimer's disease, Parkinson's disease,  
55 and amyotrophic lateral sclerosis (Dubey et al., 2015; Yasuda et al., 2017). Tyrosination/  
56 detyrosination of MT can act as a binary on/off switch for MT function (Garnham and Roll-Mecak,  
57 2012). Detyrosinated (detyr-) MTs are more stable, protected from kinesin-13 induced  
58 depolymerization and serve as tracks for transport whereas tyrosinated (tyr-) MTs play a structural  
59 role (Kaul et al., 2014; Sirajuddin et al., 2014).

60 The identity of  $\alpha$ -tubulin tyrosine carboxypeptidase (TTCP) was not known until recently when the  
61 vasohibin (vash)/small vasohibin binding protein (SVBP) complexes were discovered as the enzymes  
62 detyrosinating MTs (Aillaud et al., 2017; Nieuwenhuis et al., 2017). Vasohibins are represented by  
63 two similar and functionally redundant proteins: vash1 and its homolog vash2. They belong to the  
64 group of transglutaminase-like cysteine proteases but contain a non-canonical Cys-His-Ser catalytic  
65 triad (Aillaud et al., 2017). Vasohibins are widely distributed in eukaryotes, have broad tissue  
66 expression, and vash1 is more abundant, especially in the brain (Aillaud et al., 2017).

67 Since detyrosination has such a strong impact on MT functions, there are likely regulatory  
68 mechanisms, which can control the activity of vasohibins spatially and temporally. Both vash1 and  
69 vash2 have some basal TTCP activity, which is stronger in case of vash2 (van der Laan et al.,  
70 2019). The enzymatic activity of both vasohibins is facilitated by association with the small chaperone  
71 protein SVPB *in vivo* and *in vitro*. However, if and how vasohibin's detyrosination activity is regulated  
72 besides via SVBP binding remains unknown. Interestingly, before their identification as TTCPs,  
73 vasohibins were mostly studied as secreted proteins without any classical signal peptide sequences.  
74 Their secretion required association with SVBP but the exact mechanisms of their extracellular  
75 release are not yet understood (Kadonosono et al., 2017). The calcium-dependent non-lysosomal  
76 cysteine protease calpain 1 was shown to cleave vash1 from the N- and C-terminus, thereby altering  
77 its angiogenic activity in the extracellular space (Saito et al., 2016). Enzymatic activity of the classical  
78 calpains 1 and 2 is controlled by calcium. Intracellular calcium concentration can rapidly change  
79 depending on the physiological status of a cell, which makes calpains an attractive target in search of  
80 the mechanism regulating detyrosination of MTs. Therefore, it is still an open question whether  
81 calpain-dependent proteolysis of vasohibins could be the mechanism controlling MT detyrosination.  
82 Furthermore, several human cell lines (e.g HEK293T, UO2S) depleted of vasohibin/SVBP or mice  
83 lacking SVBP still show some remaining detyrosinating activity suggesting that there might be other  
84 enzyme(s) responsible for this microtubule modification (Aillaud et al., 2017; Liao et al., 2019;  
85 Nieuwenhuis et al., 2017; Pagnamenta et al., 2019).

86 In this study, we show that proteolytic activity of calpain 1 and 2 is required for efficient MT  
87 detyrosination in HEK293T cells. This is not due to the regulation of vasohibin activity via cleavage  
88 and not via direct modification of MT by calpain, suggesting that calpain acts upstream of a still  
89 unidentified TTCP.

## 90 **Results**

### 91 **Calpain inhibition reduces microtubule detyrosination in HEK293T cells**

92 To narrow down the class of proteases involved in detyrosination of  $\alpha$ -tubulin either via regulation of  
93 vasohibins or as additional TTCPs, we treated HEK293T cells with parthenolide (TTCP activity  
94 inhibitor), potato carboxypeptidase inhibitor (PCI, a general metalloproteinase inhibitor), or calpeptin  
95 (calpain 1 and 2 inhibitor). Interestingly, a 30 min treatment with 60  $\mu$ M calpeptin leads to a strong  
96 decrease in the amount of detyr-MTs as evidenced by immunostainings or immunoblotting with a  
97 detyr- $\alpha$ -tubulin antibody (Fig. 1B, C). To differentiate between effects on MT detyrosination via a  
98 peptidase inhibition or a tyrosine ligation via TTL (Fig. 1A), we performed calpeptin treatments on  
99 HEK293T cells where the MTs were stabilized by taxol for 30 min. Since TTL acts on soluble tubulin  
100 dimers, taxol treatment would prevent MT depolymerization, thus limiting the pool of soluble  
101 tubulin. Taxol alone increased the amount of detyr-tubulin as seen by immunocytochemistry (ICC)  
102 and immunoblotting. This is in line with the notion that long-lived MTs accumulate detyr-tubulin  
103 (Garnham and Roll-Mecak, 2012). This effect was strongly reduced by co-application of calpeptin,  
104 which indicates that calpain activity is required for the proper function of TTCP (Fig. 1B, C).

105 To distinguish between different calpains that might be involved in the regulation of TTCP we  
106 performed similar experiments using calpastatin - the only absolutely specific inhibitor for classical  
107 calpains, and PD151746 - so far the most specific calpain-1 inhibitor with a 20x higher selectivity than  
108 for calpain-2 (Fig. 1C) (Ono et al., 2016). All three inhibitors had a similar effect on detyrosination of  
109 MTs pointing to the involvement of classical calpains on MT detyrosination.

110 To further verify the involvement of calpains, we next performed knockdown experiments with  
111 calpain 1 and 2 siRNAs (Fig. 2). The specificity and functionality of the knockdown in HEK293T cells  
112 were confirmed by western blot analysis after 24 h of transfection (Fig. 2A). A strong reduction in MT  
113 detyrosination upon calpain 1 and 2 knockdown was visible in fluorescent immunostainings already  
114 after 24 h (Fig. 2B). To validate these results, we performed a western blot analysis of HEK293T cells  
115 co-transfected with vash-1-GFP and respective calpain siRNAs (Fig. 2C). Co-transfection with either  
116 calpain 1 or 2 siRNAs led to a significant decrease in detyr-MTs. The combination of both siRNAs  
117 turned out to be less efficient, probably due to the reduced amount of the individual siRNAs (Fig. 2C,

118 D). Taken together, these data indicate that conventional calpains play a role in the regulation of the  
119 MT cytoskeleton and calpain activity is required for efficient MT detyrosination.

### 120 **Calpain inhibition does not affect MT growth in HEK293T cells**

121 As MT detyrosination and stability strongly correlate (Garnham and Roll-Mecak, 2012) we next  
122 assessed the MT dynamics in HEK293T cells upon calpain knockdown (Fig. 3). HEK293T cells were co-  
123 transfected with the MT plus end marker EB3-GFP and the respective siRNAs for calpain 1 and 2.  
124 Using live total internal reflection fluorescence imaging and tracking of EB3 comets (Fig. 3A) we could  
125 not find changes in EB3 comet number (Fig. 3B), speed, or track lengths upon knockdown of calpain  
126 (Fig. 3C). Although MT detyrosination is strongly reduced upon calpain KD, it does not seem to affect  
127 MT dynamics.

### 128 **Effect of vasohibin cleavage by calpain 1 on MT detyrosinating activity**

129 Calpain 1 and 2 are the conventional and ubiquitously expressed calpain family members. They are  
130 heterodimers consisting of an identical small regulatory subunit CAPNS1 of 28 kDa size and a distinct  
131 catalytic 80 kDa subunit, CAPN1, or 2, respectively. Calpain 1 and 2 have a broad peptidase activity  
132 without clear sequence specificity (Shinkai-Ouchi et al., 2016). Predictions for cleavage sites based on  
133 amino acid sequence using machine learning indicate that calpains require longer stretches (P14-P10'  
134 and P20 to P20' for calpain 1 and 2, respectively) for substrate cleavage (Sorimachi et al., 2012).

135 Thus, it is unlikely that calpains are detyrosinating  $\alpha$ -tubulin themselves. It is more likely to be upstream  
136 of TTCP. Vash1 was previously proposed to be a substrate of calpain 1 (Saito et al., 2016) and  
137 potential cleavages have been published in context of its anti-angiogenic activity and tumor  
138 microenvironments: active 44 kDa full-length vash1 is released and proteolytically processed at the  
139 N- and C-terminus resulting in active 36 kDa and inactive 27 kDa products respectively (Saito et al.,  
140 2016; Sonoda et al., 2006). However, the consequences of vasohibin cleavage on its cytosolic  
141 functions, specifically detyrosination of MT, are completely unknown. Therefore, we next performed  
142 a set of cell free assays to investigate if calpain 1 is indeed cleaving vash1, and if it is upstream of  
143 vasohibin in the regulation of MT detyrosination (Fig. 4, 5).

144 To isolate vash1 from HEK293T cells independent of N- or C-terminal cleavage, we decided to co-  
145 purify it with SVBP-myc as a bait, as the SVBP binding site lies within the central region of vash1 (aa  
146 133-144 and 274-282) (Kadonosono et al., 2017). After on-bead calpain digestion using purified  
147 recombinant calpain 1 and subsequent separation on an SDS gel, prominent bands were excised and  
148 used to identify potential new N- and C-terminal termini (Fig. 4A). This was achieved by using dimethyl  
149 labelling at the protein level followed by enzymatic digestion in the presence 50 % heavy water

150 ( $H_2^{18}O$ ) and LC-MS analysis (Deng et al., 2015; Schnölzer et al., 1996). While new C-termini could only  
151 be identified within the linker-region and GFP (not shown), several new N-termini were found within  
152 the alanine-rich N-terminus of vash1 (Fig. 4B, Table S1-S2). Namely between residues 19A.20A and  
153 25A.26A, which were identified in both the chymotrypsin and trypsin experiments and with a large  
154 number of peptide spectral matches (PSMs). These positions are in agreement with the cleavage  
155 specificity of calpain 1 according to the MEROPS peptidase database  
156 (<https://www.ebi.ac.uk/merops/>) (Rawlings et al., 2017) in which calpain prefers alanine in the P1'  
157 site. Another less abundant cleavage site, S14.A15, was also identified in digestions experiments. This  
158 site contains an alanine residue in the P1' position and a proline residue in the P3' position, which is  
159 in line with calpain's cleavage site specificity (Figure S1). Moreover, recently published structures of  
160 vasohibins suggest a disordered N- and C-terminus terminus (Adamopoulos et al., 2019; Li et al.,  
161 2019; Liao et al., 2019; Wang et al., 2019) and therefore the alanine-rich N-terminus would be  
162 accessible to calpain, which prefers interdomain unstructured regions in its substrate binding pocket  
163 (Hosfield et al., 1999; Moldoveanu et al., 2002; Sorimachi et al., 2012). Of note, previously reported  
164 cleavage corresponding to amino acids 86/87 and 328/329 in the mouse protein (Sonoda et al., 2006)  
165 could not be confirmed.

166 After identifying these new cleavage sites, we investigated the functionality of cleaved vash1 on MT  
167 detyrosination by performing a cell free MT assay (Fig. 5). To obtain high purity, soluble,  
168 eukaryotically produced vash1, the vash1 coding sequence was cloned into a twin-strep-tag together  
169 with SVBP and purified from HEK293T cells using strep-Tactin beads (Fig. 5A). Tyrosinated MTs were  
170 prepared from porcine brain tubulin by 2 rounds of polymerization/depolymerization and incubated  
171 with purified twin-strep-tag-vash1-GFP, with or without prior calpain 1 digestion, for different time  
172 intervals from 5 to 30 min (Fig. 5B, C). Western blotting analysis confirmed that the presence of  
173 calpain 1 leads to cleavage of vash1, as the full-length-vash1 band was no longer detectable (Fig. 5B).  
174 As expected the addition of vash1 lead to a strong reduction in tyrosinated  $\alpha$ -tubulin, and an increase  
175 in detyrosinated  $\alpha$ -tubulin (Fig. 5C, D). However, this effect was largely independent of the presence  
176 of calpain 1, indicating that calpain 1 cleavage of vash1 does not affect its MT detyrosinating abilities  
177 (Fig. 5C, D). This experiment can also rule out the possibility that calpain 1 itself cleaves the C-  
178 terminal tyrosine of  $\alpha$ -tubulin.

179 To further confirm these findings in a cellular context, we cloned and overexpressed different vash1  
180 truncation constructs in HEK293T cells and quantified MT detyrosination after immunostaining: 87-  
181 375-vash1 and 87-328-vash1, representing the previously described  $\Delta N$  and  $\Delta N\Delta C$  (Sonoda et al.,  
182 2006), and the newly identified 20/25-375 (Fig. 6A). While the full-length vash1 expectedly lead to a  
183 strong increase in MT detyrosination, 87-375-vash1 and 87-328-vash1 did not have an effect,

184 indicating that N- and C- terminal truncation renders the protein functionally inactive in the context  
185 of MT detyrosination (Fig. 6B, C). The newly identified cleavage of calpain 1 in the N-terminus of  
186 vash1 (20/25-375) leads to the same increase in MT detyrosination as the full-length construct (Fig.  
187 6B, C), confirming that calpain 1 does not regulate vasohibin's function in the MT detyrosination  
188 pathway, opening a possibility that calpains act upstream of a yet unknown TTCP.

## 189 **Discussion**

190 In this work, using an inhibitor screen and immunostainings in HEK293T cells we discovered that the  
191 conventional calpains 1 and 2 are involved in the regulation of MT detyrosination. Specifically,  
192 pharmacological inhibition of calpain 1 or 2 and siRNA knockdown approaches resulted in a strong  
193 decrease of detyrosinated MT. MT stabilization by application of taxol confirmed a decrease in  
194 detyrosination, i.e., TTCP activity, rather than an increase in TTL activity. Despite the strong changes  
195 in MT detyrosination, MT number and growth seems largely unchanged upon calpain knockdown  
196 suggesting that calpains act on specific aspects of the MT cycle. Although, one should keep in mind  
197 that the used method might not be sensitive enough to detect changes in very short comet tracks.  
198 MT polymerization rates are well analyzable and unchanged upon calpain knockdown. Therefore,  
199 future studies should address the effects of calpains on MT stability, for instance by examining  
200 catastrophes and rescues.

201 The profound effect of calpain on MT detyrosination could either be explained by regulation of the  
202 TTCP vash1/2/SVBP complex activity by calpains or by the existence of another detyrosination  
203 pathway which is sensitive to calpain. Since vash1 was proposed to be a calpain 1 substrate (Saito et  
204 al., 2016), we set out to examine this possibility by performing *in vitro* cleavage assays followed by  
205 mass spectrometry analysis to identify newly created N-termini. We found that calpain 1 cleaves  
206 mouse vash1 (NP\_796328.2) in an alanine-rich stretch in the N-terminus. However, this cleavage did  
207 not affect the activity of vash1 on microtubule detyrosination, as we could show in cell free assays  
208 and in HEK293T cells. Moreover, we could not confirm the previously described cleavage products  
209 87-375-vash1 and 87-328-vash1, corresponding to the N-terminally cleaved 36 kDa ( $\Delta N$ ) and the N-  
210 and C-terminally cleaved 27 kDa ( $\Delta N\Delta C$ ) form of human vash1 from (Sonoda et al., 2006). The  
211 authors identified these cleavage products in cell culture media collected from endothelial cells, co-  
212 cultured with various cancer cell lines, and showed changed angiogenic properties of vash1. While  
213  $\Delta N$  is still active,  $\Delta N\Delta C$  is rendered inactive (Saito et al., 2016). Based on the assumption that limited  
214 proteolytic cleavage requires basic residues (Seidah and Chrétien, 1999) both truncation variants  
215 were identified in a mutagenesis screen where arginines were mutated to alanines. Calpains are  
216 calcium-dependent proteases with a broad endopeptidase activity without clear sequence specificity



217 (Shinkai-Ouchi et al., 2016), but calpain 1 seems to prefer alanine in the P1' site (MEROPS peptidase  
218 database) (Rawlings et al., 2017). Both cleavage sites for  $\Delta N$  and  $\Delta N\Delta C$  however do not show this  
219 alanine site. This might be a reason, why we could not identify those previously described cleavage  
220 products. Additionally, we used mouse vash1, while studies on the angiogenetic effects of vash1 are  
221 based on the human protein. Both share a 93 % sequence identity, but the mouse sequence contains  
222 10 additional amino acids in the N terminus (aa 21-30, Fig. 4B), a stretch that is highly enriched in  
223 alanines, and contains the newly identified calpain cleavage sites.

224 The shorter cleavage products 87-375-vash1 and 87-328-vash1 were ineffective in increasing MT  
225 detyrosination in HEK293T cells. We conclude, that the cytosolic (e.g. detyrosination) activity of  
226 vash1 is independent of its angiogenic extracellular effect and both are regulated independently.  
227 Vash1 seem to be present ubiquitously in the brain (<http://www.proteinatlas.org>) (Uhlén et al.,  
228 2015), but at low to medium levels (and is currently not possible to detect in ICCs (unpublished data,  
229 personal communication Marie-Jo Moutin), while vash2 expression might be even lower  
230 (<http://www.proteinatlas.org>) (Uhlén et al., 2015). However, both have a strong effect on MT  
231 detyrosination, suggesting that low proteins amounts are sufficient for proper cellular functioning  
232 and possibly pointing to increased importance of regulation of vasohibin activity.

233 Calpain 1 and 2 as major non-lysosomal proteases play an important role in cell signaling due to the  
234 limited proteolysis of their substrates - both in physiological and pathological conditions  
235 (Moldoveanu et al., 2002). Proper neuronal branching, spine complexity and therefore hippocampal  
236 long-term plasticity and spatial memory depend on the presence of calpains (Amini et al., 2013;  
237 Zadran et al., 2010). Excessive calcium influx, occurring for instance during stroke, leads to increased  
238 calpain activity and MT destabilization, cleavage of MAP2, spectrin, internexin and others, finally  
239 leading to the breakdown of the cytoskeleton and cell death. The conventional calpains 1 and 2 seem  
240 to affect a still unknown TTCP rather than regulating vasohibin activity. This could provide another  
241 explanation why SVBP knockout mice show only an approx. 40 % reduction in detyr-MT (Pagnamenta  
242 et al., 2019) that might not fully be accounted for by the presence of the C-terminal tyrosine-lacking  
243  $\alpha$ -4-tubulin. Considering that inhibition of calpains leads to a loss of MT detyrosination it seems that  
244 calpain is an activator of this unknown TTCP. Regulation of PTMs of MTs and calpains has been  
245 shown to be important for several cellular processes in various cell types. The detyrosination status  
246 of MTs is essential for the function of the mitotic spindle, formed during cell division. Inhibition of  
247 detyrosination leads to misalignment of pole-proximal chromosomes during chromosome  
248 congression and delayed mitotic progression. This process depends on CENP/E (kinesin 7), which  
249 strongly prefers detyrosinated MTs (Barisic et al., 2015). During cell division, calpain 2 is upregulated  
250 in the G2-M phase and a reduction or inhibition of calpain 2 causes chromosome misalignment due

251 to polar ejection force impairment (Honda et al., 2004). Thus, both (PTM and calpain activity) play  
252 together in maintaining proper cellular function.

253 Calpains calcium dependency can give rise to a fine regulation of MT detyrosination. This could be  
254 especially important in excitable cells, such as muscle cells and neurons, that undergo strong changes  
255 in intracellular calcium levels and therefore calpain activity. In neurons, MTs play a major role in  
256 intracellular transport. Using motor-PAINT (motor protein-based point accumulation for imaging in  
257 nanoscale topology) and expansion microscopy it was recently shown that neurons contain bundles  
258 of spatially segregated stable and dynamic MTs with respective post-translational modifications  
259 (Jurriens et al., 2021; Tas et al., 2017). As both types of MTs are oriented in opposing directions and  
260 are preferred by different motor proteins, this allows for selective entry of motor proteins into either  
261 dendrites or axons. Therefore, PTMs of MTs, such as detyrosination, play a major role in the  
262 regulation of intracellular transport and neuronal morphology. Additionally, it was shown by  
263 immunostainings and fluorescent peptidase activity readouts in combination with calpain inhibitors,  
264 that calpain 1 and even more notably calpain 2, are present and active in neurites of pyramidal  
265 neurons *in vitro* and *in vivo* (Mingorance-Le Meur and O'Connor, 2009). This seems to be most  
266 prominent in axons and apical dendrites, the places with most microtubules detyrosination within  
267 neurons. The importance of MT detyrosination is further supported by the recent discovery of  
268 several families carrying SVBP “null” mutations, that lead to severe neurological deficits (Iqbal et al.,  
269 2019; Pagnamenta et al., 2019). Thus, identifying the calpain-regulated pathway of MT  
270 detyrosination can be of major importance for several basic and clinical research and should be  
271 focused on in future studies.

## 272 **Methods**

### 273 **Cloning**

274 All used plasmids and cloned construct are listed in table 1. For cloning of the vash1 truncation  
275 constructs, respective nucleotides were amplified via PCR from the full-length construct with primers  
276 containing restriction sites XbaI and AgeI and cloned back into the full-length backbone via standard  
277 restriction digestion & ligation cloning protocols. vash1-87-375-sfGFP-his IRES SVBP-myc and vash1-  
278 87-328-sfGFP-his IRES SVBP-myc correspond to the N-terminally cleaved 36 kDa and the N- and C-  
279 terminally cleaved 27kDa form of human Vasohin 1 from (Sonoda et al., 2006). The Twin-strep-tag-  
280 vash1-GFP IRES SVBP construct was obtained by cold fusion cloning of a gBlock containing the twin-  
281 strep-tag (TwinStrep-mCherry empty vector was a gift from A. Aher and A. Akhmanova, Utrecht  
282 University) into the Bsu15I digested full-length vash construct.

## 283 **Cell Culture, transfections and treatments**

284 HEK293T cells were grown in DMEM (Thermo Fisher #41966-029) +10 % FCS (Thermo Fisher  
285 #10270106) + 1x penicillin-streptomycin (Thermo Fisher #15140122) at 37 °C in 5 % CO<sub>2</sub>, 95 %  
286 humidity atmosphere and split twice per week. Cells for immunocytochemistry were plated on poly-L-  
287 lysin (Sigma P2636) coated glass coverslips, for biochemistry directly in 6-well plates. HEK293T cells  
288 were authenticated and tested for contamination by the supplier and used within 35 passages.  
289 Cells were transfected using maxPEI or lipofectamine 2000 (for siRNA experiments) using the  
290 manufacturers' protocols 1 day after splitting cells and fixed or harvested after 24 h. For siRNA  
291 experiments, 15 pmol siRNA was used in combination with 0.6 µg DNA per well in a 12-well plate (1  
292 ml volume). Only 0.3 µg pmaxGFP as a cell fill was used. Amounts were accordingly adjusted for use  
293 of 6-well plates. Treatments of HEK293T cells were performed so that all groups were  
294 fixed/harvested at the same time. The treatment details are: DMSO (1 h 1:1000), CPI (24 h 50 µg/ml),  
295 parthenolide (100 nM 24 h), calpeptin (60 µM 30 min), taxol (10 nM 30 min), calpastatin (20 µM 1h),  
296 PD151746 (260 nM 1 h).

## 297 **Immunocytochemistry (ICC)**

298 ICC on HEK293T cells was performed as described previously (Bär et al., 2016). Briefly, cells were  
299 fixed with 4 % PFA/4 % sucrose, washed in PBS, permeabilized in 0.2 % Triton X-100 in PBS and  
300 blocked in blocking buffer (BB, 10 % horse serum, 1 % Triton X-100 in PBS). Primary antibodies were  
301 diluted in BB (anti-detyr- $\alpha$ -tubulin 1:400, anti- $\alpha$ -tubulin 1:600) and coverslips incubated over night at  
302 4 °C. After additional washing with PBS, corresponding fluorescently labelled secondary antibodies  
303 (all 1:500 diluted in BB) were applied for 1-2 h at room temperature, before final washing with PBS  
304 and mounting of coverslips on objective slides with mowiol.

## 305 **Cell lysates and Western Blots**

306 Cell homogenates/extracts of HEK293T cells were prepared as follows: Cells were shortly washed  
307 with warm PBS, harvested in Tris-buffered saline (TBS, 20 mM Tris, 150 mM NaCl, pH 7.4) + 1 %  
308 Triton X-100 + protease inhibitor cocktail (PI)). Hot 4x SDS sample buffer (250mM Tris-HCl, pH 6.8, 8  
309 % (w/v) SDS, 40 % (v/v) Glycerol, 20 % (v/v)  $\beta$ -mercaptoethanol, 0.008 % bromophenol blue, pH 6.8)  
310 was added directly and samples boiled for 5 min. Equal amounts of samples were separated on a 10  
311 % polyacrylamide gel and transferred to a PVDF membrane.

312 The membranes were blocked for 1 h in 5 % milk in Tris-buffered saline with 0.1 % Tween-20 at room  
313 temperature and incubated overnight at 4 °C with primary antibodies in TBS with 0.02 % NaN<sub>3</sub> (anti-  
314 detyr- $\alpha$ -tubulin 1:1000, anti- $\beta$ -actin 1:5000, anti-tyr- $\alpha$ -tubulin 1:1000, anti-calpain1 1:200, anti-

315 calpain 2 1:200, vasohibin 1 1:100, anti-GAPDH 1:200. After washing in TBS + 0.1 % Tween and TBS,  
316 the membranes were incubated with secondary antibodies in 5 % milk in TBS + 0.1 % Tween for 1-2 h  
317 at room temperature, washed, and signals detected using ECL solution on an INTAS ChemoCam  
318 Imager (Intas Science Imaging). Detyr- $\alpha$ -tubulin, Tyr-  $\alpha$ -tubulin and total  $\alpha$ -tubulin were detected on  
319 different membranes, and the loading (actin, GAPDH) was detected on identical membranes and  
320 used for normalization. The Fiji tool “Analyze gels” was used to quantify band intensities.

## 321 **Microscopy**

### 322 Widefield

323 Widefield imaging was performed at a Nikon Eclipse Ti-E microscope controlled by VisiView software  
324 and equipped with standard GFP, RFP, and Cy5 filters. Illumination was achieved by an LED light  
325 source. Use of a 100x (*Nikon*, ApoTIRF 1.49 oil), 60x 1.4NA (*Nikon*, CFI Plan Apo Lambda Oil) or 40x  
326 1.3NA (*Nikon*, CFI Plan Fluor Oil) objective for imaging for transfected HEK293T or neurons, yielded  
327 pixel sizes of 65 nm, 108 nm or 162.5 nm. Images were taken at 16 bit depth and 2048 x 2048 pixel  
328 on an Orca flash 4.0LT CMOS camera (*Hamamatsu*). In part, several images on different z-positions  
329 were taken to cover the complete cells and maximum projections calculated for representation.

### 330 Confocal microscopy

331 Confocal imaging was performed at a Leica TCS SP5 confocal microscope (*Leica microsystems*,  
332 *Mannheim, Germany*), controlled by Leica Application Suite Advanced Fluorescence software.  
333 Samples were imaged using a 63x oil objective (*Leica*, 63x HCX PL APO Lbd. Bl. Oil/1.40 oil).  
334 Fluorophores were excited with Multi-Argon 488 nm, Diode Pumped Solid State 561 nm, HeNe  
335 633 nm lasers and signals detected using HyD detectors. Pixel depth of 8 bit and frame averaging of 2  
336 was used. Dimensions were set to 1024 x 1024 pixels and zoom set so that the resulting pixel size is  
337 120 nm. Images were acquired at 400 Hz and as z-stacks with a step size of 0.29  $\mu$ m.

### 338 Live imaging of EB3-GFP comets

339 Imaging of EB3 comets was performed 24h after transfection of HEK293T cells with EB3-GFP and  
340 tubulin-mCherry in combination with the different siRNAs. A Nikon Eclipse Ti-E controlled by VisiView  
341 software was used. Illumination was done by 488 nm excitation laser excitation controlled by a  
342 Targeted Laser Illuminator 2 (iLas2, *Gatata Systems*) in total internal reflection fluorescence (TIRF)  
343 mode/oblique illumination. Emission was collected through a quad band filter (*Chroma*, ZET  
344 405/488/561/647m) and emission filters (*Chroma*, ET525/50m, ET595/50m, ET700/75m) on an Orca  
345 flash 4.0LT CMOS camera (*Hamamatsu*). The use of a 100x TIRF objective (*Nikon*, ApoTIRF 100x/1.49  
346 oil) resulted in a pixel size of 65 nm. Images were acquired at 2-3 Hz with 200-300 ms illumination.

347 **Pulldown and *in vitro* calpain cleavage of flag-vash1-GFP + SVBP-myc for mass spectrometry**  
348 **analysis of cleavage sites**

349 HEK293T cells were transfected with flag-vash1-GFP + SVBP-myc construct using maxPEI. After 24 h  
350 cells were washed with cold TBS (20 mM Tris, 150 mM NaCl, pH 8.0), and harvested in extraction  
351 buffer (20 mM Tris, 150 mM NaCl, 0.5 % Triton X-100, 2x PI, pH 8.0). Extraction was performed for  
352 30 min on ice, followed by centrifugation at 14000 x g at 4 °C and supernatant used. Myc-Trap  
353 agarose beads A (Chromotek, yta-2 Myc Trap\_A) were prepared by 3 rounds of washing in extraction  
354 buffer and centrifugation at 1000 x g for 5min at 4 °C. Beads were incubated with HEK extracts at 4 °C  
355 overnight at slow rotation. Unbound fraction was removed by centrifugation at 1000 x g for 5 min at  
356 4 °C. Beads were washed 3 times in extraction buffer and equally split into 2 samples for on bead  
357 calpain digestion and control. Beads were washed 3 times with TBS to remove protease inhibitors  
358 and washed once with TBS + 2 mM CaCl<sub>2</sub>. 50 µl TBS + CaCl<sub>2</sub> (all component 1.2x concentrated) was  
359 added to both samples. In vitro calpain cleavage was achieved by adding 10 µl calpain (>20 U,  
360 resulting in 1x concentration of TBS) and incubation at 30 °C for 5 min. The reaction was stopped by  
361 addition of 20 µl hot 4x SDS buffer, and the sample was boiled for 5 min. The control sample was  
362 treated equally except that 10 µl H<sub>2</sub>O were added instead of calpain. Samples were separated on a  
363 commercial 4-12 % bis tris plus SDS gel (Thermo Fisher #NW04120BOX).

364 **Mass spectrometry**

365 Gel bands were cut into 2 mm<sup>3</sup>, destained using 100 mM ammonium bicarbonate (ABC), 30%  
366 acetonitrile (ACN) in 50 mM ABC buffer followed by dehydration with ACN and then dried using  
367 vacuum centrifugation. Samples were reduced with dithiothreitol (10 mM) in TEAB buffer (pH 8.5) for  
368 30 min at 60°C and alkylated with iodoacetamide (55 mM) at room temperature for 15 min.  
369 The gel pieces were washed with 30 % ACN, in HEPES buffer (25 mM) and then dehydrated with ACN.  
370 After drying the amino groups (N-terminus and lysine residues) were reductively dimethylated using  
371 40 mM formaldehyde, 20 mM sodium cyanoborohydride in HEPES buffer (250 mM, pH 7) at 37°C for  
372 16 h. The reaction was quenched using 0.9 M of Tris buffer (pH 6.8) for 3 hr followed by multiple  
373 washing steps, i.e., 50 mM ABC in 30 % ACN (15 min), 100% ACN (15 min), drying in a vacuum  
374 centrifuge (10 min). After quenching the gel bands were incubated with enzyme either trypsin (50  
375 ng) or chymotrypsin (100 ng) in the presence of 50% H<sub>2</sub><sup>18</sup>O (heavy water). Trypsin samples were  
376 incubated with 25 mM ABC, while bands digested chymotrypsin also included 2 mM CaCl<sub>2</sub> in the  
377 digestion buffer. Samples were incubated overnight a 37°C and after digestion the reaction was  
378 quenched using 10 % formic acid (FA). The peptides from the gel bands were extracted with 50% ACN  
379 in 1% FA and 100% ACN using sonication. Pooled extracts were dried down and the samples  
380 resuspended in 3% ACN, 0.1% trifluoroacetic acid (TFA) prior to LC-MS.

381 In-gel digested samples were analyzed on a Dionex Ultimate 3000 nano-UHPLC coupled to a Q  
382 Exactive mass spectrometer (Thermo Scientific, Bremen). The samples were washed on a trap  
383 column (Acclaim Pepmap 100 C18, 5 mm × 300 μm, 5 μm, 100 Å, Dionex) for 4 min with 3 %  
384 ACN/0.1 % TFA at a flow rate of 30 μl/min prior to peptide separation using an Acclaim PepMap 100  
385 C-18 analytical column (50 cm × 75 μm, 2 μm, 100 Å, Dionex). A flow rate of 300 nL/min using eluent  
386 A (0.05 % FA) and eluent B (80 % ACN/0.04 % FA) was used for gradient separation. Spray voltage  
387 applied on a metal-coated PicoTip emitter (10 μm tip size, New Objective, Woburn, Massachusetts,  
388 US) was 1.7 kV, with a source temperature of 250 °C. Full scan MS spectra were acquired between  
389 300 and 2,000 *m/z* at a resolution of 70,000 at *m/z* 400. The ten most intense precursors with charge  
390 states greater than 2+ were selected with an isolation window of 2.1 *m/z* and fragmented by HCD  
391 with normalized collision energies of 27 at a resolution of 17,500. Lock mass (445.120025) and  
392 dynamic exclusion (15 s) were enabled.

393 The MS raw files were processed by Proteome Discover 2.2 (Thermo, version 2.2.0.388) and MS/MS  
394 spectra were searched using the Sequest HT algorithm against a database containing common  
395 contaminants (45 sequences), the canonical human database and recombinant flag-vash1-GFP-his.  
396 For trypsin, the enzyme specificity was set to semi-Arg-C specificity with two missed cleavages  
397 allowed. For samples incubated with chymotrypsin, no enzyme specificity was used. An MS1  
398 tolerance of 10 ppm and a MS2 tolerance of 0.02 Da was implemented. Oxidation (15.995 Da) of  
399 methionine residues, dimethylation (28.031 Da) on the peptide N-terminus, and heavy water  
400 (2.004 Da) on the peptide C-terminus were set as a variable modification. Carbamidomethylation  
401 (57.02146 Da) on cysteine residues along with dimethylation on lysine residues were set as a static  
402 modification. Minimal peptide length was set to 6 amino acids and the peptide false discovery rate  
403 (FDR) was set to 1 %. Peptide peak intensities were calculated using the Minora. Peak intensities  
404 were only used if they were identified as high-confident.

405 Abundances of all the N-termini that were identified with high confidence for bands 2,3,4 and 1  
406 (control) for both chymotrypsin (Supplemental Table 1) and trypsin (Supplemental Table 1)  
407 digestions. Samples were analyzed from lowest molecular weight to highest molecular weight, with  
408 control measured last. The same volume of digested peptide extract was loaded for LC-MS for all  
409 samples. All peptides shown have their N-terminus and their lysine residues dimethylated. The large  
410 number of N-termini identified in the control sample may be due to degradation of vash1 or  
411 insufficient quenching of labeling reagents prior to enzymatic digestion. N-termini were only  
412 considered to be calpain cleavage events if they were identified in both the chymotrypsin and trypsin  
413 experiments and were also not observed in the calpain control. Peptide was also identified in control



414 sample, but with very low intensity and likely to be a result of carryover. Most probably calpain  
415 cleavage sites, based on intensity and number of PSMs, are highlighted.

#### 416 **Purification of twin-strepTag-vash1-GFP for *in vitro* MT assays**

417 HEK293T cells were transfected at 60-70 % confluency using maxPEI with twin-strep-tag-vash1-GFP  
418 IRES SVBP construct 24 h before purification. Cells were washed once with ice-cold TBS and  
419 harvested in ice-cold TBS subsequently. The cells were centrifuged at 1000 x g for 3 min at 4 °C and  
420 resuspended in extraction buffer (20 mM Tris, 300 mM NaCl, 1 % Triton X-100, 5 mM MgCl<sub>2</sub>, 1 x  
421 cComplete, EDTA-free Protease Inhibitor Cocktail (Sigma), pH 8.0) and incubated for 30 min on ice.  
422 The cell lysate was centrifuged at 14000 x g for 15 min at 4 °C. The supernatant was collected and  
423 incubated with Strep-Tactin Sepharose High Performance beads (GE Healthcare) for 1 h at 4 °C on  
424 slow rotation. The beads were centrifuged at 1000 x g for 1 min at 4 °C and the cell lysate was taken  
425 off. Beads were washed 3 times with washing buffer (20 mM Tris, 150 mM NaCl, 0.5 % Triton X-100,  
426 2 mM EGTA, 1 x cComplete, EDTA-free Protease Inhibitor Cocktail (Sigma), pH 8.0). Elution was  
427 performed 3 times for 10 min incubation in elution buffer (100 mM Tris, 150 mM NaCl, 1 mM EDTA,  
428 50 mM D-Biotin, 1 mM DTT) followed by centrifugation at 1000 x g for 1 min.

429 The purified protein was stored on ice until further use. Purification was controlled by adding 5 µL of  
430 2 x SDS buffer to 5 µL of first elution, boiling the sample for 5 min and running SDS-PAGE with BSA  
431 standard on a 10 % SDS-polyacrylamide gel. The gel was stained with Coomassie Brilliant Blue R250  
432 (Roth) for 30 min at room temperature and destained with MilliQ-water over night at room  
433 temperature.

#### 434 ***In vitro* cleavage of purified twin-strepTag-vash1-GFP by calpain 1**

435 1 µM purified twin-strepTag-vash1-GFP was incubated with 5 µL calpain1 (>10 U) in 100 mM TBS  
436 with 2 mM CaCl<sub>2</sub> for 5 min at 37°C. Afterwards, the samples were put on ice immediately and used  
437 straight away.

438 The Calpain1 cleavage of twin-StrepTag-vash1-GFP was analyzed by SDS-PAGE with 12 % SDS-  
439 polyacrylamide gel and followed by western blot (procedure: see above). Blocking was done for 30  
440 min with 5 % milk powder in TBS-T. Primary antibodies used were anti-calpain1 (1:100 in TBS with  
441 0.02 % NaN<sub>3</sub>), anti-vasohibin 1 (1:100 in TBS with 0.02 % NaN<sub>3</sub>). Secondary antibody used was anti-  
442 mouse-HRP (1:20000 in TBS-T). The blots were developed using ECL solution on an INTAS ChemoCam  
443 Imager.

#### 444 ***In vitro* MT detyrosination assay**

445 2 rounds of MT polymerization and cold-induced depolymerization were performed to enrich for  
446 tyrosinated-tubulin. A mix of 20  $\mu$ M of porcine brain tubulin protein (Cytoskeleton/TeBu-Bio) with  
447 1 mM GMPCPP (Jena Bioscience) in PEM80 (80 mM Pipes, 1 mM EGTA, 4 mM  $MgCl_2$ ) was made on  
448 ice and subsequently incubated at 37 °C for 30 min for production of microtubule seeds. The sample  
449 was centrifuged at 120000 x g for 5 min at 25 °C to remove polymerized MTs from solution. The  
450 supernatant was discarded, and the pellet was resuspended in PEM80 to about 20  $\mu$ M tubulin  
451 assuming 80 % recovery. The resuspended tubulin was incubated for 20 min on ice to depolymerize  
452 the MTs. Then GMPCPP was added to a concentration of 1 mM and incubated 5 min more on ice and  
453 subsequently, the process was repeated.

454 After the second round of MT polymerization and depolymerization, the sample was incubated for 30  
455 min at 37 °C to obtain MTs. 0.1  $\mu$ M of purified twin-StrepTag-vash1-GFP, 0.1  $\mu$ M *in vitro* calpain1  
456 cleaved twin-StrepTag-vash1-GFP (see above) or elution buffer (see above) without protein as  
457 negative control were added to MTs and incubated for 5, 10, 20 or 30 min at 37 °C. The reaction was  
458 stopped by addition of hot 4 x SDS buffer, and samples were boiled for 5 min.

459 Equal amounts of the samples were analyzed by SDS-PAGE with 12 % SDS-polyacrylamide gel,  
460 followed by western blot (procedure: see above). Blocking was done for 30 min with 5 % milk powder  
461 in TBS-T. Primary antibodies used were anti-detyr- $\alpha$ -tubulin (1:1000 in 5 % milk powder in TBS-T),  
462 anti-tyr- $\alpha$ -tubulin (1:1000 in 5 % milk powder in TBS-T) and anti-  $\alpha$ -tubulin (1:2000 in TBS with 0.02 %  
463  $NaN_3$ ). Secondary antibodies used were anti-rabbit-HRP (1:20000 in TBS-T) and anti-mouse-HRP  
464 (1:20000 in TBS-T). The blots were developed using ECL solution on an INTAS ChemoCam Device.  
465 Band intensity integration areas were analyzed using the “Analyze gels” tool of Fiji. The ratio tyr- $\alpha$ -  
466 tubulin/anti- $\alpha$ -tubulin was calculated and normalized to the corresponding control.

#### 467 **Data analysis**

##### 468 Comets tracks and counts

469 2 min of live imaging was analyzed after applying a background subtraction. EB3 comets were  
470 detected and analyzed using the Fiji (Schindelin et al., 2012) plugin “TrackMate” version v5 (Tinevez  
471 et al., 2017) using the following settings: Particle detection with LoG detection, initial particle size of  
472 approx 0.4-0.5  $\mu$ m, threshold set individually per video., no median filter applied, with subpixel  
473 localization and without quality filters for the detection of spots themselves. For tracking the simple  
474 LAP tracker was used with the following settings: 0.2-0.5  $\mu$ m linking max distance, 0.5-0.8  $\mu$ m gap-  
475 closing distance and 0-6 gap closing max frame gap. Tracks below 5 s tracking length were excluded



476 to remove very short and unreliably tracked comets. This may result in insensitivity to changes in  
477 very short tracks but allows the proper quantification of EB track speeds. To estimate the number of  
478 EB3 comets, the number of tracks containing the first frame was counted.

#### 479 ICC quantification

480 Detyr- $\alpha$ -tubulin/ $\alpha$ -tubulin ratios in immunostainings were analyzed as follows: Cells were outlined by  
481 using the total tubulin channel, that was after strong smoothing and despeckling, semi-automatically  
482 thresholded and manually corrected to exclude dividing cells, dense cell clusters and parts of cells on  
483 the edge of the field of view. Afterwards, the GFP channel was smoothed and despeckled and used to  
484 identify transfected cells in the same way, and cell outlines were corrected with the help of the total  
485 tubulin channel. Subtraction of the total cell outline and the transfected cell outline was calculated to  
486 obtain the outline of non-transfected cells. Total tubulin and detyr-tubulin average intensity values  
487 within the transfected and untransfected cells were measured in the original images. For each image,  
488 the detyr- $\alpha$ -tubulin/ $\alpha$ -tubulin ratio of transfected and untransfected cells was calculated and  
489 afterwards intensities of transfected cells normalized to untransfected cells. Data from several 3  
490 independent experiments were normalized to control, before pooling data. An experimenter blinded  
491 to the experimental groups performed all analyses.

#### 492 **Statistical analysis and image representation**

493 Statistical analysis was performed using Prism version 6.07 (GraphPad). Data are represented as  
494 mean  $\pm$  SEM. Data were tested for normal distribution (D'Agostino & Pearson omnibus normality  
495 test) and statistical test chosen accordingly. Individual channels of multi-color micrographs were  
496 contrasted for better representation, with identical settings within 1 experiment. All analysis was  
497 performed on raw images.

498 Table 1: Crucial reagents and resources

| Reagent or Resource                                  | Supplier                              | Identifier      |
|------------------------------------------------------|---------------------------------------|-----------------|
| <b>Antibodies</b>                                    |                                       |                 |
| anti-calpain 2 (#A-16)                               | Santa Cruz                            | Cat#sc-373966   |
| anti-calpain1 (#A-27)                                | Santa Cruz                            | Cat#sc-390677   |
| anti-detyr- $\alpha$ -tubulin (#72)                  | Abcam                                 | Cat#ab48389     |
| anti-GAPDH (#A-12)                                   | Santa Cruz                            | Cat#sc-32233    |
| Anti-total- $\alpha$ -tubulin (#1)                   | Sigma Aldrich                         | Cat#T6074       |
| anti-tyr- $\alpha$ -tubulin (#52)                    | Synaptic Systems                      | Cat#302111      |
| anti-vasohibin 1 (#A-11)                             | Santa Cruz                            | Cat#sc-365541   |
| anti- $\alpha$ -tubulin (#1)                         | Sigma Aldrich                         | Cat#T5168       |
| anti- $\beta$ -actin (#10)                           | Sigma Aldrich                         | Cat#A5441       |
| anti-mouse-Alexa Fluor 488                           | Thermo Fisher Scientific              | Cat#A-11001     |
| anti-mouse-Alexa Fluor 568                           | Thermo Fisher Scientific              | Cat#A-11004     |
| anti-mouse-Alexa Fluor 647                           | Thermo Fisher Scientific              | Cat#A-21235     |
| anti-rabbit-Alexa Fluor 488                          | Thermo Fisher Scientific              | Cat#A-11034     |
| anti-rabbit-Alexa Fluor 568                          | Thermo Fisher Scientific              | Cat#A-11036     |
| anti-rabbit-Alexa Fluor 647                          | Thermo Fisher Scientific              | Cat#A-21236     |
| anti-rabbit-HRP                                      | Dianova/ Jackson<br>ImmunoResearch    | Cat#111-035-144 |
| anti-mouse-HRP                                       | Dianova/ Jackson<br>ImmunoResearch    | Cat#115-035-146 |
| <b>Chemicals, Peptides, and Recombinant Proteins</b> |                                       |                 |
| calpain 1                                            | Biomol/ US Biological Life<br>Science | Cat#C1035-27    |
| calpastatin peptide                                  | Calbiochem/ Merck Millipore           | Cat#208902      |
| calpeptin                                            | Calbiochem/ Merck Millipore           | Cat#03-34-0051  |
| carboxypeptidase inhibitor (PCI)                     | Sigma Aldrich                         | Cat#C0279       |
| cOplete™, EDTA-free Protease<br>Inhibitor Cocktail   | Sigma Aldrich                         | Cat#04693132001 |
| D+-Biotin                                            | Carl Roth                             | Cat#3822.2      |
| DAPI                                                 | Sigma Aldrich                         | Cat#D9542       |
| GMPPCP                                               | Jena Bioscience                       | Cat#NU-405      |

|                                                                               |                             |                     |
|-------------------------------------------------------------------------------|-----------------------------|---------------------|
| lipofectamine 2000                                                            | Invitrogen                  | Cat#11668027        |
| maxPEI                                                                        | Polysciences                | Cat#24765-1         |
| parthenolide                                                                  | Sigma Aldrich               | Cat#P0667           |
| PD151746                                                                      | Sigma Aldrich               | Cat#SML0402         |
| protease inhibitor cocktail                                                   | Roche                       | Cat#04 693 116 001  |
| StrepTactin™ Sepharose™ High Performance beads                                | GE Healthcare               | Cat#28-9355-99      |
| taxol                                                                         | Tocris                      | Cat#1097            |
| tubulin protein from porcine brain                                            | Cytoskeleton/ Tebu-Bio      | Cat#T240            |
| Cell Lines                                                                    |                             |                     |
| HEK293T                                                                       | DSMZ                        | Cat#ACC635          |
| Oligonucleotides                                                              |                             |                     |
| siRNA luciferase                                                              | Sigma Aldrich               | Cat#EHURLUC         |
| siRNA-A                                                                       | Santa Cruz                  | Cat#sc-37007        |
| siRNA calpain 1                                                               | Santa Cruz                  | Cat#sc-29885        |
| siRNA calpain 2                                                               | Santa Cruz                  | Cat#sc-41459        |
| twin-strep-tag_Cla1_Kozak                                                     | Integrated DNA Technologies | custom order gBlock |
| Constructs                                                                    |                             |                     |
| ptagRFP-C                                                                     | Evrogen                     | Cat#FP141           |
| flag-full-length vash1-sfGFP-his IRES SVBP-myc (mouse)                        | (Aillaud et al., 2017)      | N/A                 |
| vash1-20-375-sfGFP-his IRES SVBP-myc (mouse)                                  | This paper                  | N/A                 |
| vash1-25-375-sfGFP-his IRES SVBP-myc (mouse)                                  | This paper                  | N/A                 |
| 87-375ΔN-vash1-GFP sfGFP-his IRES SVBP-myc (mouse) [vash1 amino acids 87-375] | This paper                  | N/A                 |
| 87-328ΔNΔC-vash1-sfGFP-his IRES SVBP-myc (mouse) [vash1 amino acids 87-328]   | This paper                  | N/A                 |
| twin-strep-tag-flag-full-length-vash1-eGFP-his IRES SVBP-myc (HH415)          | This paper                  | N/A                 |

|                                    |                           |                                                                                                                                             |
|------------------------------------|---------------------------|---------------------------------------------------------------------------------------------------------------------------------------------|
| EB3-GFP (HH136)                    | (Stepanova et al., 2003)  | N/A                                                                                                                                         |
| mcherry-tubulin (HH222)            | (Cloin et al., 2017)      | N/A                                                                                                                                         |
| pmaxGFP                            | Lonza                     | From kit Cat#V4XP-3012                                                                                                                      |
| <b>Software and Algorithms</b>     |                           |                                                                                                                                             |
| Excel - 365                        | Microsoft                 | <a href="https://www.microsoft.com/en-gb/">https://www.microsoft.com/en-gb/</a>                                                             |
| Fiji 1.49v - 1.53v                 | (Schindelin et al., 2012) | <a href="http://fiji.sc/">http://fiji.sc/</a>                                                                                               |
| Prism Version 6.05                 | GraphPad                  | <a href="https://www.graphpad.com/scientific-software/prism/">https://www.graphpad.com/scientific-software/prism/</a>                       |
| Proteome Discover 2.2 (v2.2.0.388) | Thermo Fisher Scientific  | <a href="https://www.thermofisher.com/order/catalog/product/OPTON-20141">https://www.thermofisher.com/order/catalog/product/OPTON-20141</a> |

499 **Acknowledgements**

500 We would like to thank the CNI Imaging facility of the Leibniz Institute for Neurobiology, Magdeburg,  
501 for access to their Leica SP5 confocal microscope, Daniela Hacker for help with initial antibody  
502 characterizations, Marie-Jo Moutin for kindly providing the flag-full-length-vash1-sfGFP-his IRES  
503 SVBP-myc and the vash knockdown constructs, as well as Amol Aher and Anna Akhmanova for kindly  
504 providing the twinStrep-mCherry empty vector.

505 **Competing Interests**

506 No competing interests declared.

507 **Funding**

508 Deutsche Forschungsgemeinschaft (DFG Emmy Noether Programme MI1923/1-2; SFB877 project B12  
509 and project Z2, Excellence Strategy – EXC-2049–390688087), Hertie Network of Excellence in Clinical  
510 Neuroscience.

511 **Data availability**

512 N/A

## References

**Adamopoulos, A., Landskron, L., Heidebrecht, T., Tsakou, F., Bleijerveld, O. B., Altelaar, M., Nieuwenhuis, J., Celie, P. H. N., Brummelkamp, T. R. and Perrakis, A.** (2019). Crystal structure of the tubulin tyrosine carboxypeptidase complex VASH1–SVBP. *Nature Structural & Molecular Biology* **26**, 567-570.

**Aillaud, C., Bosc, C., Peris, L., Bosson, A., Heemeryck, P., Van Dijk, J., Le Fricq, J., Boulan, B., Vossier, F., Sanman, L. E. et al.** (2017). Vasohibins/SVBP are tubulin carboxypeptidases (TCPs) that regulate neuron differentiation. *Science* **358**, 1448-1453.

**Amini, M., Ma, C.-I., Farazifard, R., Zhu, G., Zhang, Y., Vanderluit, J., Zoltewicz, J. S., Hage, F., Savitt, J. M., Lagace, D. C. et al.** (2013). Conditional Disruption of Calpain in the CNS Alters Dendrite Morphology, Impairs LTP, and Promotes Neuronal Survival following Injury. *The Journal of Neuroscience* **33**, 5773-5784.

**Bär, J., Kobler, O., van Bommel, B. and Mikhaylova, M.** (2016). Periodic F-actin structures shape the neck of dendritic spines. *Scientific Reports* **6**, 37136.

**Barisic, M., Silva e Sousa, R., Tripathy, S. K., Magiera, M. M., Zaytsev, A. V., Pereira, A. L., Janke, C., Grishchuk, E. L. and Maiato, H.** (2015). Microtubule deetyrosination guides chromosomes during mitosis. *Science* **348**, 799-803.

**Chen, C. Y., Caporizzo, M. A., Bedi, K., Vite, A., Bogush, A. I., Robison, P., Heffler, J. G., Salomon, A. K., Kelly, N. A., Babu, A. et al.** (2018). Suppression of deetyrosinated microtubules improves cardiomyocyte function in human heart failure. *Nat Med* **24**, 1225-1233.

**Cloin, B. M. C., De Zitter, E., Salas, D., Gielen, V., Folkers, G. E., Mikhaylova, M., Bergeler, M., Krajnik, B., Harvey, J., Hoogenraad, C. C. et al.** (2017). Efficient switching of mCherry fluorescence using chemical caging. *Proceedings of the National Academy of Sciences* **114**, 7013-7018.

**Deng, J., Zhang, G., Huang, F.-K. and Neubert, T. A.** (2015). Identification of Protein N-Termini Using TMPP or Dimethyl Labeling and Mass Spectrometry. In *Proteomic Profiling: Methods and Protocols*, (ed. A. Posch), pp. 249-258. New York, NY: Springer New York.

**Desai, A. and Mitchison, T. J.** (1997). Microtubule polymerization dynamics. *Annu Rev Cell Dev Biol* **13**, 83-117.

**Dimitrov, A., Quesnoit, M., Moutel, S., Cantaloube, I., Poüs, C. and Perez, F.** (2008). Detection of GTP-Tubulin Conformation in Vivo Reveals a Role for GTP Remnants in Microtubule Rescues. *Science* **322**, 1353-1356.

**Dubey, J., Ratnakaran, N. and Koushika, S.** (2015). Neurodegeneration and microtubule dynamics: death by a thousand cuts. *Front Cell Neurosci* **9**.

**Garnham, C. P. and Roll-Mecak, A.** (2012). The chemical complexity of cellular microtubules: Tubulin post-translational modification enzymes and their roles in tuning microtubule functions. *Cytoskeleton* **69**, 442-463.

**Heinz, L. S., Muhs, S., Schiewek, J., Grüb, S., Nalaskowski, M., Lin, Y.-N., Wikman, H., Oliveira-Ferrer, L., Lange, T., Wellbrock, J. et al.** (2017). Strong fascin expression promotes metastasis independent of its F-actin bundling activity. *Oncotarget* **8**.

**Honda, S., Marumoto, T., Hirota, T., Nitta, M., Arima, Y., Ogawa, M. and Saya, H.** (2004). Activation of m-calpain is required for chromosome alignment on the metaphase plate during mitosis. *J Biol Chem* **279**, 10615-23.

**Iqbal, Z., Tawamie, H., Ba, W., Reis, A., Halak, B. A., Sticht, H., Uebe, S., Kasri, N. N., Riazuddin, S., van Bokhoven, H. et al.** (2019). Loss of function of SVBP leads to autosomal recessive intellectual disability, microcephaly, ataxia, and hypotonia. *Genet Med* **21**, 1790-1796.

**Janke, C.** (2014). The tubulin code: Molecular components, readout mechanisms, and functions. *Journal of Cell Biology* **206**, 461-472.

**Jurriens, D., van Batenburg, V., Katrukha, E. A. and Kapitein, L. C.** (2021). Mapping the neuronal cytoskeleton using expansion microscopy. *Methods Cell Biol* **161**, 105-124.

**Kadonosono, T., Yimchuen, W., Tsubaki, T., Shiozawa, T., Suzuki, Y., Kuchimaru, T., Sato, Y. and Kizaka-Kondoh, S.** (2017). Domain architecture of vasohibins required for their chaperone-dependent unconventional extracellular release. *Protein Science* **26**, 452-463.

**Kaul, N., Soppina, V. and Verhey, K. J.** (2014). Effects of  $\alpha$ -tubulin K40 acetylation and deetyrosination on kinesin-1 motility in a purified system. *Biophys J* **106**, 2636-43.

**Li, F., Hu, Y., Qi, S., Luo, X. and Yu, H.** (2019). Structural basis of tubulin deetyrosination by vasohibins. *Nature Structural & Molecular Biology* **26**, 583-591.

**Liao, S., Rajendraprasad, G., Wang, N., Eibes, S., Gao, J., Yu, H., Wu, G., Tu, X., Huang, H., Barisic, M. et al.** (2019). Molecular basis of vasohibins-mediated deetyrosination and its impact on spindle function and mitosis. *Cell Research* **29**, 533-547.

**Mingorance-Le Meur, A. and O'Connor, T. P.** (2009). Neurite consolidation is an active process requiring constant repression of protrusive activity. *Embo j* **28**, 248-260.

**Moldoveanu, T., Hosfield, C. M., Lim, D., Elce, J. S., Jia, Z. and Davies, P. L.** (2002). A Ca<sup>2+</sup> switch aligns the active site of calpain. *Cell* **108**, 649-60.

**Nieuwenhuis, J., Adamopoulos, A., Bleijerveld, O. B., Mazouzi, A., Stickel, E., Celie, P., Altelaar, M., Knipscheer, P., Perrakis, A., Blomen, V. A. et al.** (2017). Vasohibins encode tubulin deetyrosinating activity. *Science* **358**, 1453-1456.

**Ono, Y., Saido, T. C. and Sorimachi, H.** (2016). Calpain research for drug discovery: challenges and potential. *Nature Reviews Drug Discovery* **15**, 854-876.

**Pagnamenta, A. T., Heemeryck, P., Martin, H. C., Bosc, C., Peris, L., Uszynski, I., Gory-Faure, S., Couly, S., Deshpande, C., Siddiqui, A. et al.** (2019). Defective tubulin deetyrosination causes structural brain abnormalities with cognitive deficiency in humans and mice. *Hum Mol Genet* **28**, 3391-3405.

**Rawlings, N. D., Barrett, A. J., Thomas, P. D., Huang, X., Bateman, A. and Finn, R. D.** (2017). The MEROPS database of proteolytic enzymes, their substrates and inhibitors in 2017 and a comparison with peptidases in the PANTHER database. *Nucleic Acids Research* **46**, D624-D632.

**Redeker, V.** (2010). Chapter 6 - Mass Spectrometry Analysis of C-Terminal Posttranslational Modifications of Tubulins. In *Methods Cell Biol*, vol. 95 (eds L. Wilson and J. J. Correia), pp. 77-103: Academic Press.

**Saito, M., Suzuki, Y., Yano, S., Miyazaki, T. and Sato, Y.** (2016). Proteolytic inactivation of anti-angiogenic vasohibin-1 by cancer cells. *The Journal of Biochemistry* **160**, 227-232.

**Schindelin, J., Arganda-Carreras, I., Frise, E., Kaynig, V., Longair, M., Pietzsch, T., Preibisch, S., Rueden, C., Saalfeld, S., Schmid, B. et al.** (2012). Fiji: an open-source platform for biological-image analysis. *Nature Methods* **9**, 676-682.

**Schnölzer, M., Jedrzejewski, P. and Lehmann, W. D.** (1996). Protease-catalyzed incorporation of <sup>18</sup>O into peptide fragments and its application for protein sequencing by electrospray and matrix-assisted laser desorption/ionization mass spectrometry. *ELECTROPHORESIS* **17**, 945-953.

**Seidah, N. G. and Chrétien, M.** (1999). Proprotein and prohormone convertases: a family of subtilases generating diverse bioactive polypeptides. *Brain Research* **848**, 45-62.

**Shinkai-Ouchi, F., Koyama, S., Ono, Y., Hata, S., Ojima, K., Shindo, M., duVerle, D., Ueno, M., Kitamura, F., Doi, N. et al.** (2016). Predictions of Cleavability of Calpain Proteolysis by Quantitative Structure-Activity Relationship Analysis Using Newly Determined Cleavage Sites and Catalytic Efficiencies of an Oligopeptide Array. *Mol Cell Proteomics* **15**, 1262-1280.

**Sirajuddin, M., Rice, L. M. and Vale, R. D.** (2014). Regulation of microtubule motors by tubulin isoforms and post-translational modifications. *Nat Cell Biol* **16**, 335-344.

**Sonoda, H., Ohta, H., Watanabe, K., Yamashita, H., Kimura, H. and Sato, Y.** (2006). Multiple processing forms and their biological activities of a novel angiogenesis inhibitor vasohibin. *Biochem Biophys Res Commun* **342**, 640-646.

**Sorimachi, H., Mamitsuka, H. and Ono, Y.** (2012). Understanding the substrate specificity of conventional calpains. *Biological Chemistry* **393**, 853-871.

**Stepanova, T., Slemmer, J., Hoogenraad, C. C., Lansbergen, G., Dortland, B., De Zeeuw, C. I., Grosveld, F., van Cappellen, G., Akhmanova, A. and Galjart, N.** (2003). Visualization of Microtubule Growth in Cultured Neurons via the Use of EB3-GFP (End-Binding Protein 3-Green Fluorescent Protein). *The Journal of Neuroscience* **23**, 2655-2664.

**Tas, R. P., Chazeau, A., Cloin, B. M. C., Lambers, M. L. A., Hoogenraad, C. C. and Kapitein, L. C.** (2017). Differentiation between Oppositely Oriented Microtubules Controls Polarized Neuronal Transport. *Neuron* **96**, 1264-1271.e5.

**Théry, M. and Blanchoin, L.** (2021). Microtubule self-repair. *Curr Opin Cell Biol* **68**, 144-154.

**Tinevez, J.-Y., Perry, N., Schindelin, J., Hoopes, G. M., Reynolds, G. D., Laplantine, E., Bednarek, S. Y., Shorte, S. L. and Eliceiri, K. W.** (2017). TrackMate: An open and extensible platform for single-particle tracking. *Methods* **115**, 80-90.

**Uhlén, M., Fagerberg, L., Hallström, B. M., Lindskog, C., Oksvold, P., Mardinoglu, A., Sivertsson, Å., Kampf, C., Sjöstedt, E., Asplund, A. et al.** (2015). Tissue-based map of the human proteome. *Science* **347**, 1260419.

**van der Laan, S., Lévêque, M. F., Marcellin, G., Vezenkov, L., Lannay, Y., Dubra, G., Bompard, G., Ovejero, S., Urbach, S., Burgess, A. et al.** (2019). Evolutionary Divergence of Enzymatic Mechanisms for Tubulin Detyrosination. *Cell Reports* **29**, 4159-4171.e6.

**Wang, N., Bosc, C., Ryul Choi, S., Boulan, B., Peris, L., Olieric, N., Bao, H., Krichen, F., Chen, L., Andrieux, A. et al.** (2019). Structural basis of tubulin detyrosination by the vasohibin–SVBP enzyme complex. *Nature Structural & Molecular Biology* **26**, 571-582.

**Yasuda, K., Clatterbuck-Soper, S. F., Jackrel, M. E., Shorter, J. and Mili, S.** (2017). FUS inclusions disrupt RNA localization by sequestering kinesin-1 and inhibiting microtubule detyrosination. *Journal of Cell Biology* **216**, 1015-1034.

**Zadran, S., Bi, X. and Baudry, M.** (2010). Regulation of Calpain-2 in Neurons: Implications for Synaptic Plasticity. *Mol Neurobiol* **42**, 143-150.



## Figure 1

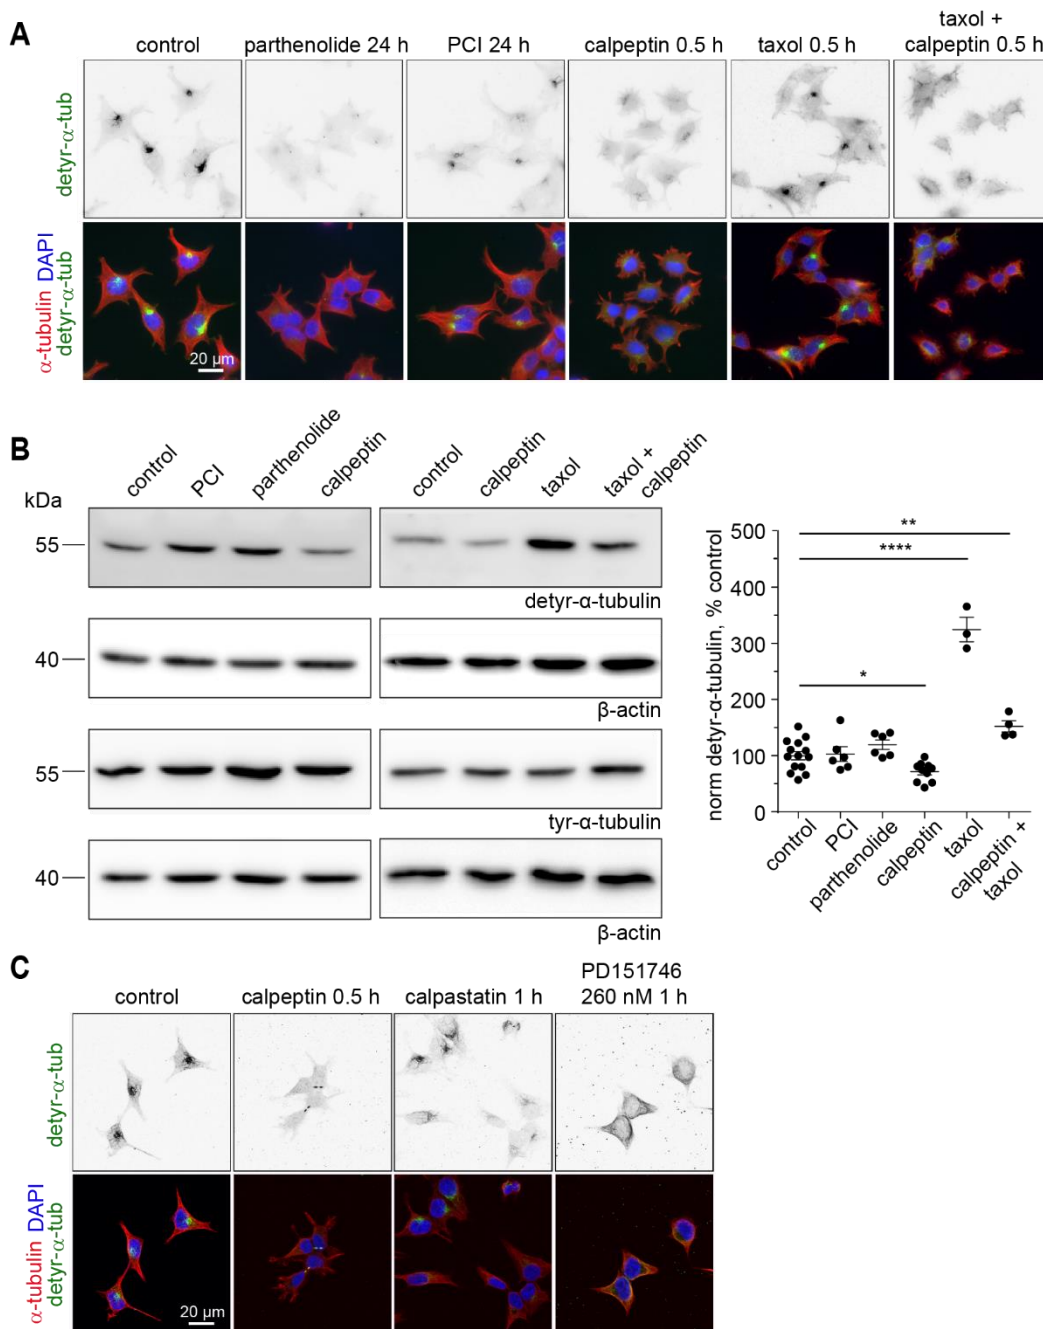

**Figure 1** Microtubule detyrosination in HEK293T cells depends on classical calpains.

A) Representative fluorescence widefield images of untreated HEK293T cells, and cells treated with indicated inhibitors and stained for detyrosinated (green) and total (red) tubulin.

B) Treatment of cells with the calpain inhibitor calpeptin reduces the amount of detyrosinated MT. Example western blot and quantification. Data are represented as mean  $\pm$  SEM. Dots represent individual measurements from 3 independent experiments. 1-Way-ANOVA ( $p < 0.0001$ ) with Dunnett's multiple comparison test against control. \*  $p \approx 0.04$ , \*\*  $p \approx 0.004$ , \*\*\*\*  $p < 0.0001$ .



C) Representative maximum projections of fluorescence confocal images of HEK293T cells treated with DMSO as control and different calpain inhibitors show the importance of calpain in MT detyrosination. Note the strong reduction in detyr-tubulin staining intensity (green) upon calpeptin treatment.

## Figure 2

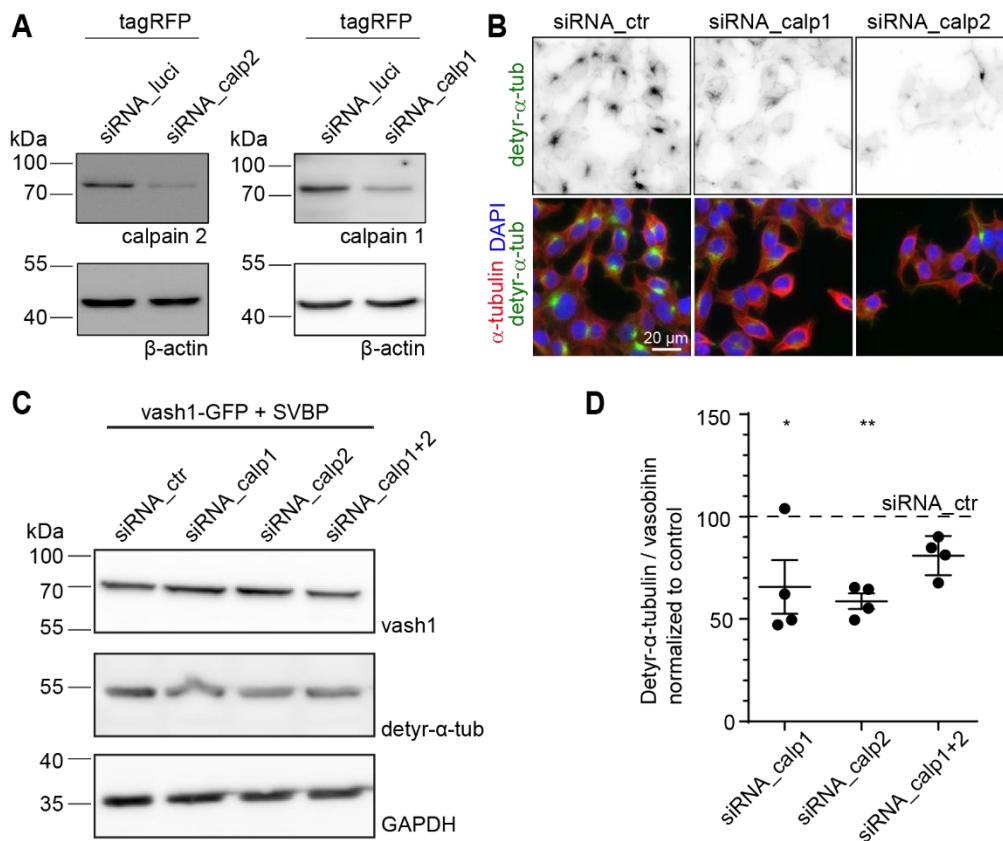

**Figure 2** Knockdown of calpain 1/2 leads to reduction of detyrosinated  $\alpha$ -tubulin.

A) Confirmation of knockdown of calpain1/2 in HEK293T using western blotting. HEK293T cells were transfected with tagRFP and respective siRNAs for 24 h.  $\beta$ -actin was used as a loading control.

B) Representative maximum projections of fluorescence widefield images of HEK293T cells transfected with different siRNAs for 24 h and stained for detyr-tubulin (green) and total tubulin (red) shows reduction of detyrosination.

C) HEK293T cells were double transfected with vash1-GFP-SVBP and siRNA for calpain as indicated for 24 h. Cells were harvested, lysed, and subjected to western blotting.

D) Quantification of C) n= 4 independent experiments with 1-3 samples per group. 1-Way-ANOVA [F(3,12)=6.3 p=0.008] with Dunnett's post-hoc test. \* p<0.05, \*\* p<0.01.

## Figure 3

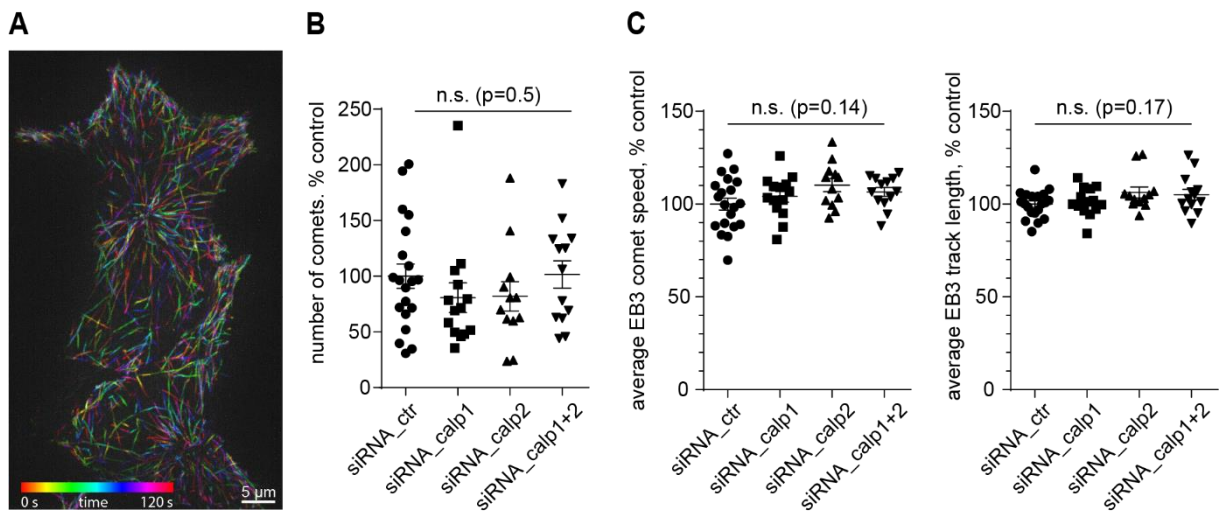

**Figure 3** Knockdown of calpain 1 or 2 has no effect on MT growth/dynamics.

A) Representative image of EB3 comets imaged over 2 min in HEK293T cells. Temporal color code shown in bottom left.

B) Number of EB3-comets per cell area is unchanged upon knockdown of calpains. 1-Way ANOVA.  $n = 20$  (siRNA\_ctr), 14 (siRNA\_calp1), 12 (siRNA\_calp2), 13 (siRNA\_calp1+2) cells from 2 independent experiments. Data are represented as mean  $\pm$ SEM.

C) Quantification of comet speed and track length. 1-Way ANOVA.  $n = 20$  (siRNA\_ctr), 14 (siRNA\_calp1), 12 (siRNA\_calp2), 13 (siRNA\_calp1+2) cells from 2 independent experiments. Data are represented as mean  $\pm$ SEM.

## Figure 4

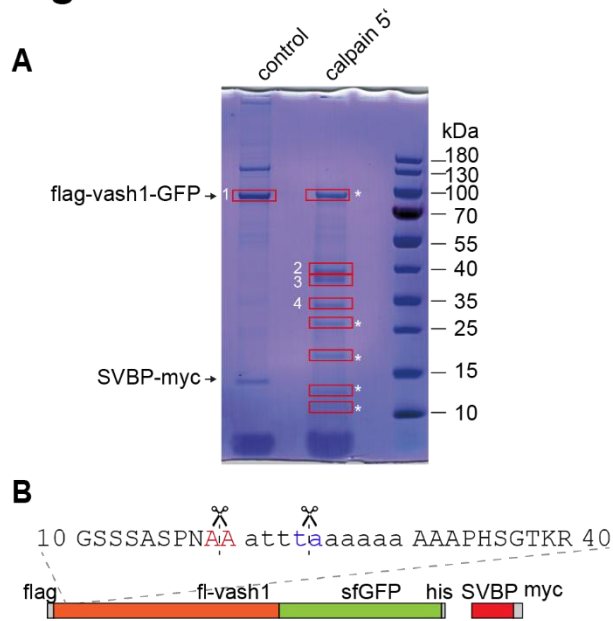

**Figure 4** Identification of calpain cleavage sites within vash1 by mass spectrometry

A) SDS-PAGE showing purified SVBP-myc and co-purified vash1-GFP with and without on bead-calpain digestion (>20 U, 5 min). Boxed bands were cut and used for mass spectrometry. Asterisks indicate bands enriched in calpain 1 catalytic subunit.

B) Identified N-termini upon calpain cleavage after trypsin and chymotrypsin digest and N-terminal dimethylation. Highlighted are newly identified N-termini present in both trypsin and chymotrypsin digest. Small letter residues are contained in mouse vash1, but not human. Also see Tables S1 and S2.

## Figure 5

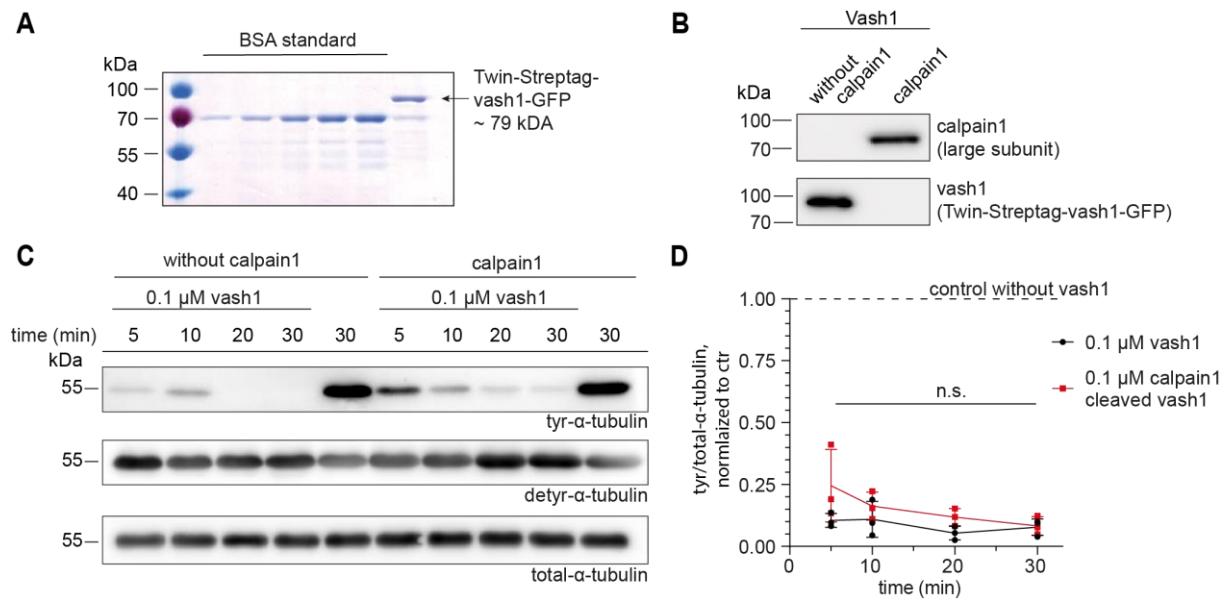

**Figure 5** Calpain 1 cleavage has no influence on vash1-mediated MT detyrosination *in vitro*.

A) Coomassie-stained 10 % SDS-polyacrylamide gel of purified twin-Streptag-vash1-GFP from HEK293T cells. Vash1: 1.5  $\mu$ g in 5  $\mu$ L, BSA standard: 0.25, 0.5, 1.0, 1.5, 2.0  $\mu$ g.

B) Western blot showing cleavage of purified vash1 in presence of calpain 1.

C) Purified vash1 causes strong loss of tyr- $\alpha$ -tubulin signal and increase in detyr- $\alpha$ -tubulin signal in western blot from MTs *in vitro*, independent of prior cleavage by calpain 1 and incubation time.

D) Quantification of tyr/total- $\alpha$ -tubulin ratio normalized to a negative control without vash1. n=3 independent experiments. 2-Way ANOVA followed by Tukey's multiple comparisons test (condition  $\pm$  calpain1 p=0.1701).

## Figure 6

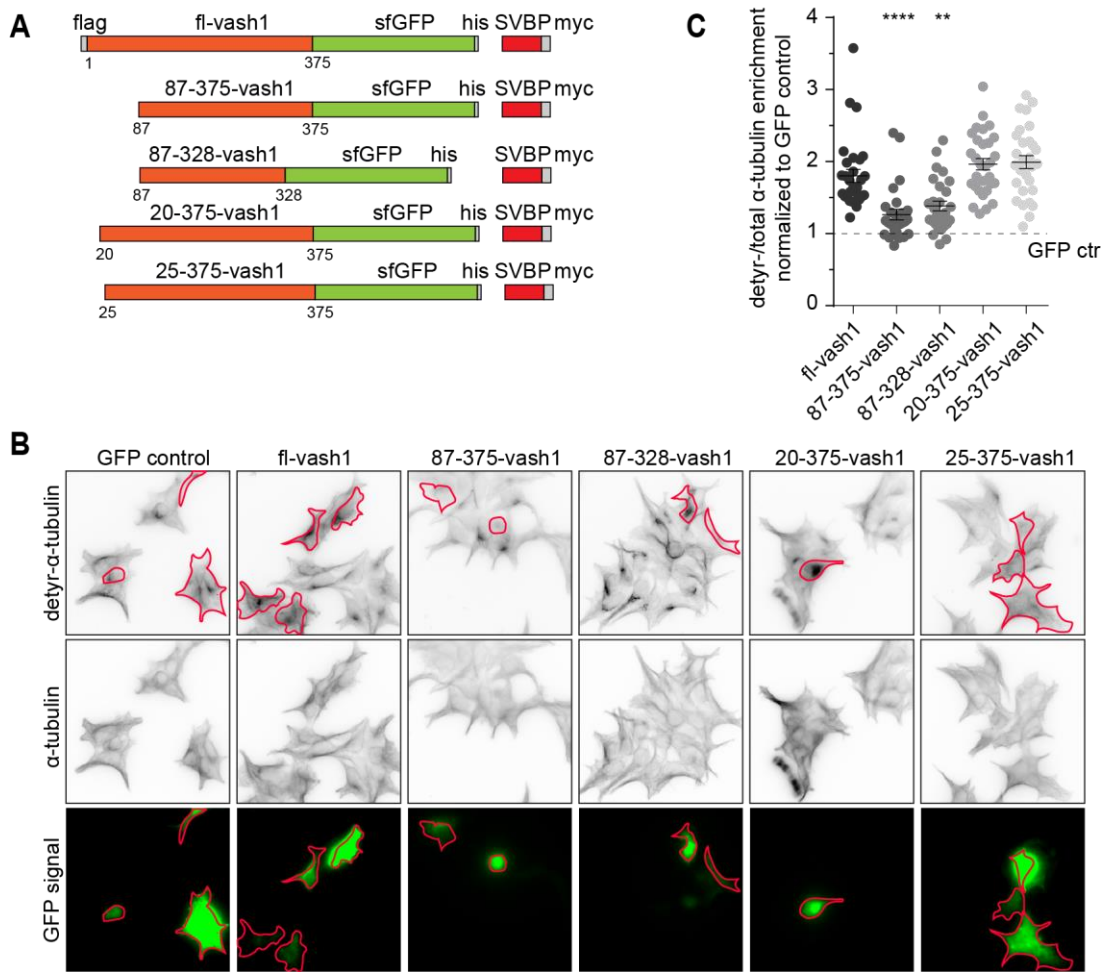

**Figure 6** Effects of vash1 truncation constructs on MT detyrosination. Overexpression of full-length vash1 and calpain-cleaved vash1 leads to MT detyrosination in HEK293T cells.

A) Scheme showing vash1 and its truncation constructs used for overexpression in HEK293T cells.

B) Representative widefield fluorescence images of HEK293T cells transfected with the indicated constructs and stained for detyr-tubulin and total  $\alpha$ -tubulin. Transfected cells are outlined in green.

C) Quantification of detyr/total tubulin ratio in transfected HEK293T cells compared to untransfected cells, normalized to GFP control. n = 30 (GFP), 30 (fl-vash1), 27 (87-375-vash1), 28 (87-328-vash1), 30 (20-375-vash1), 29 (25-375-vash1) in 3 independent experiments. Kruskal-Wallis test ( $p < 0.0001$ ) with Dunn's multiple comparison test. \*\*\*\*  $p < 0.0001$ , \*\*  $p = 0.0035$ .
